# Supplementary material
Source: PubMed Central journal article supplement (PMC9235544)
Supplement: NIHMS1815130-supplement-Supplementary_Material.pdf [file NIHMS1815130-supplement-Supplementary_Material.pdf]

Dynamic interplay between life events and course of psychotic disorders: 10-year longitudinal  
study following first admission

Kayla R. Donaldson, M.A.<sup>1</sup>, Katherine Jonas, Ph.D.<sup>2</sup>, Yuan Tian, MSc<sup>3</sup>, Emmett M. Larsen,  
M.A.<sup>1</sup>, Daniel N. Klein, Ph.D.<sup>1</sup>, Aprajita Mohanty, Ph.D.<sup>1</sup>, Evelyn Bromet, Ph.D.<sup>2</sup>, & Roman  
Kotov, Ph.D.<sup>2</sup>

<sup>1</sup>Department of Psychology, Stony Brook University

<sup>2</sup>Stony Brook Medicine Department of Psychiatry

<sup>3</sup>Department of Applied Mathematics and Statistics, Stony Brook University

**Corresponding Author:**

Kayla R. Donaldson, M.A.  
Department of Psychology  
Stony Brook University  
Stony Brook, NY, 11794-2500  
Phone: 763-354-4963  
Email: [kayla.donaldson@stonybrook.edu](mailto:kayla.donaldson@stonybrook.edu)

## Supplementary Material

*Supplemental Table 1. Life Event Categories*

| <b>Negative Event Categories</b> | <b>Positive Event Categories</b>  |
|----------------------------------|-----------------------------------|
| Laid off                         | New residence                     |
| Wage cut                         | Returned to old job               |
| Reduced family income            | Started new job                   |
| Property damage or robbery       | Started school/vocational program |
| Accident                         | Promoted                          |
| Driver's license suspended       | Engaged or married                |
| Arrested                         | Started romantic relationship     |
| Other legal problems             | Had/adopted a baby                |
| Death of close other             | Child had/adopted a baby          |
| Illness of close other           |                                   |
| Got separated or divorced        |                                   |
| Parents separated or divorced    |                                   |
| Abortion or miscarriage          |                                   |

*Supplemental Table 2. Impact of Demographics on Effects of Adverse LEs*

|                           | <b>Without Covariates<sup>1</sup></b> |         | <b>With Covariates</b> |         |
|---------------------------|---------------------------------------|---------|------------------------|---------|
|                           | $\beta$                               | p       | $\beta$                | p       |
| <b>Reality Distortion</b> | .07                                   | .006*   | .09                    | .001*   |
| <b>Disorganization</b>    | .07                                   | .002*   | .08                    | .001*   |
| <b>Negative Symptoms</b>  | -.08                                  | <.0001* | -.07                   | <.0001* |
| <b>Mania</b>              | .08                                   | .002*   | .08                    | .003*   |
| <b>Depression</b>         | .06                                   | .019*   | .06                    | .016*   |

<sup>1</sup>Regression models covarying for demographic factors including age, sex, diagnosis, SES; \*p<.05.

*Supplemental Table 3. Impact of Demographics on Slope of Adverse LE – Symptoms*

| Effect <sup>1</sup>            | <i>Reality<br/>distortion (β)</i> | <i>Disorgani<br/>zation (β)</i> | <i>Negative<br/>SX (β)</i> | <i>Mania<br/>(β)</i> | <i>Depression<br/>(β)</i> |
|--------------------------------|-----------------------------------|---------------------------------|----------------------------|----------------------|---------------------------|
| <b>Negative LE * Age</b>       | -.02                              | .01                             | -.00                       | -.02                 | .04                       |
| <b>Negative LE * Diagnosis</b> | .00                               | -.01                            | -.13*                      | -.08                 | -.05                      |
| <b>Negative LE * Sex</b>       | -.04                              | -.05                            | -.02                       | -.07                 | -.12*                     |
| <b>Negative LE * SES</b>       | -.02                              | -.05                            | -.01                       | -.02                 | .03                       |

<sup>1</sup>LE=Life Events, SX=Symptoms; \*p<.05

*Supplemental Table 4. Negative Symptom Covariate Models*

|                          | <b>Negative LEs</b> |       |                 |       | <b>Positive LEs</b> |       |                 |       |
|--------------------------|---------------------|-------|-----------------|-------|---------------------|-------|-----------------|-------|
|                          | Original Model      |       | Covariate Model |       | Original Model      |       | Covariate Model |       |
|                          | $\beta$             | p     | $\beta$         | p     | $\beta$             | p     | $\beta$         | p     |
| <b>Negative Symptoms</b> | -.08                | <.001 | -.09            | <.001 | -.13                | <.001 | -.12            | <.001 |

Note: LEs = Life Events. Original Model reflects negative symptoms regressed on LEs. Covariate Model reflects negative symptoms, antipsychotic medication, and depressive symptoms regressed on LEs.

Supplemental Figure 1. Negative Symptoms and Adverse Life Events

Moderating effect of diagnosis on relationship of adverse LEs with negative symptoms. LEs = Life Events; OPD = Other Psychotic Disorders; SZ = Schizophrenia-Spectrum.

Supplemental Figure 2. Depression and Adverse Life Events

Moderating effect of gender on relationship of adverse LEs with depression. LEs = Life Events;  
F = Female; M = Male.
